# Supplementary material
Source: PubMed Central journal article supplement (PMC3100400)
Supplement: NIHMS280725-supplement-1.pdf [file NIHMS280725-supplement-1.pdf]

## **Supporting Information**

**Extracts from the aerial portions of goldenseal (*Hydrastis canadensis* L.) synergistically enhance the antibacterial activity of berberine via efflux pump inhibition**

Keivan A. Ettefagh<sup>1</sup>, Johnna T. Burns<sup>1</sup>, Hiyas A. Junio<sup>1</sup>, Glenn W. Kaatz<sup>2</sup>, Nadja B. Cech<sup>1\*</sup>

## **Affiliation**

<sup>1</sup>Department of Chemistry/Biochemistry, The University of North Carolina Greensboro, 435 Sullivan Bldg, Greensboro, NC 27402, USA

<sup>2</sup> Division of Infectious Disease, John Dingell Department of Veteran Affairs Medical Center and Department of Internal Medicine, Wayne State University School of Medicine, Detroit, MI 48201, USA

**\*corresponding author**, email: [nadja\\_cech@uncg.edu](mailto:nadja_cech@uncg.edu), voice 336-334-3017, fax 336-334-5402

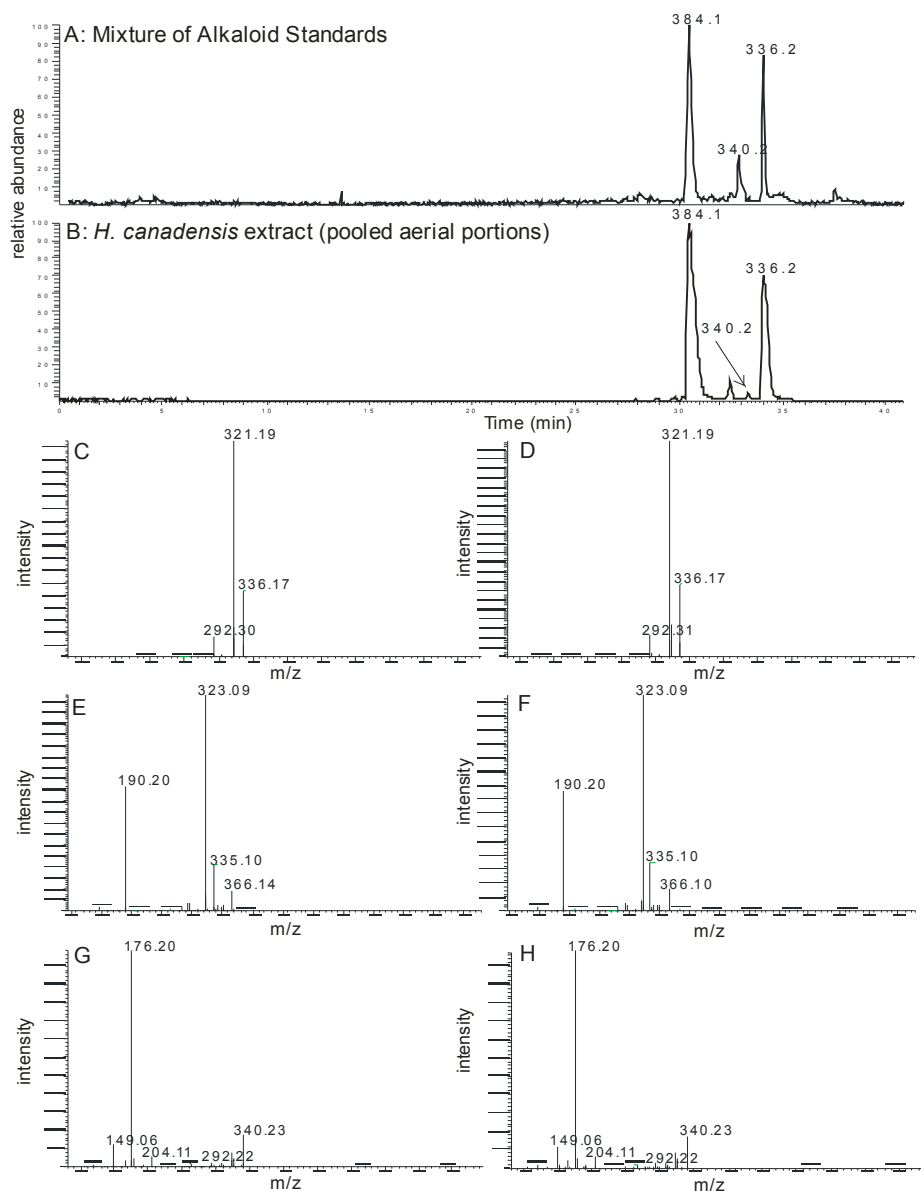

Figure 2. Comparison of base peak LC-MS chromatograms for an equimolar mixture of the standard alkaloids berberine, hydrastine and canadine at 1  $\mu$ M (A) and a 100-fold dilution of a ethanolic extract from the pooled aerial portions of goldenseal (*H. canadensis*) (B). The numbers above the peaks indicate the m/z value of the ion detected, which was consistent with  $M^+$  for berberine (monoisotopic mass of 336.12 g/mole), and  $MH^+$  for hydrastine and canadine (monoisotopic masses of 384.14 and 340.15 g/mole, respectively). CID fragments of the  $M^+$  ion for berberine (C), the  $MH^+$  ion for hydrastine (E), and the  $MH^+$  ion for canadine (G), matched those obtained for the corresponding ions in the extract (D, F, and H). Alkaloids were identified in all other extracts using the same type of chromatographic and spectroscopic data shown here.

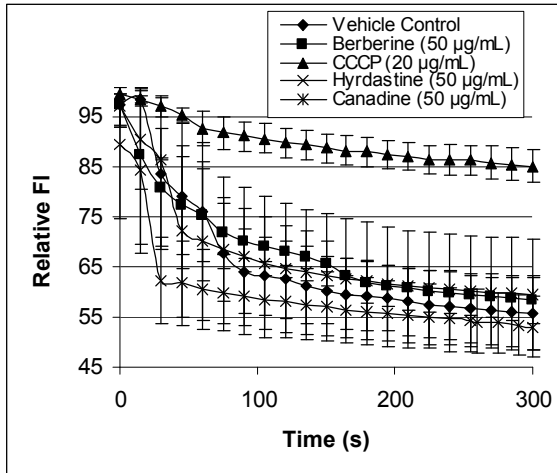

Figure 6. Percent fluorescence over time for *S. aureus* (NCTC 8325-4) loaded with ethidium bromide and treated with various compounds and controls. Treatments included the known efflux pump inhibitor CCCP (positive control), and purified standards of the alkaloids berberine, hydrastine and canadine. All extracts and CCCP were dissolved in Müller Hinton broth containing 2% DMSO. Data points represent the average of three separate experiments (using 3 different pellets of *S. aureus*). Error bars are +/- standard error.
